# Supplementary material
Source: PubMed Central journal article supplement (PMC7664125)
Supplement: 160859_2_supp_568763_qd49vk.pdf [file 160859_2_supp_568763_qd49vk.pdf]

# **Serum protein profiling reveals a landscape of inflammation and immune signaling in early-stage COVID-19 infection**

Xin Hou<sup>1,3</sup>, Xiaomei Zhang<sup>2,3</sup>, Xian Wu<sup>1,3</sup>, Minya Lu<sup>1,3</sup>, Dan Wang<sup>2</sup>, Meng Xu<sup>2</sup>, Hongye Wang<sup>2</sup>, Te Liang<sup>2</sup>, Jiayu Dai<sup>2</sup>, Hu Duan<sup>2</sup>, Yingchun Xu<sup>1,4</sup>, Xiaobo Yu<sup>2,4</sup>, Yongzhe Li<sup>1,4</sup>.

<sup>1</sup>Department of Clinical Laboratory & Beijing Key Laboratory for Mechanisms Research and Precision Diagnosis of Invasive Fungal Diseases, Peking Union Medical College Hospital, Chinese Academy of Medical Science & Peking Union Medical College, Beijing 100730, China.

<sup>2</sup>State Key Laboratory of Proteomics, Beijing Proteome Research Center, National Center for Protein Sciences-Beijing (PHOENIX Center), Beijing Institute of Lifeomics, Beijing, 102206, China.

<sup>3</sup>These authors contributed equally to this work.

<sup>4</sup>Correspondence to [yongzhelipumch@126.com](mailto:yongzhelipumch@126.com), [yuxiaobo@mail.ncpsb.org](mailto:yuxiaobo@mail.ncpsb.org) and [xycpumch@139.com](mailto:xycpumch@139.com).

## **Supplementary Tables**

|                       |                                                               |
|-----------------------|---------------------------------------------------------------|
| Supplementary Table 1 | All COVID-19 and influenza patients enrolled in this study    |
| Supplementary Table 2 | List of proteins that are detected by antibody microarray     |
| Supplementary         | List of differentially-expressed serum proteins identified in |

|                          |                                                                                                                                   |
|--------------------------|-----------------------------------------------------------------------------------------------------------------------------------|
| Table 3                  | COVID-19 patients compared to the influenza patients                                                                              |
| Supplementary<br>Table 4 | Biological processes of differentially-expressed serum proteins identified in COVID-19 patients                                   |
| Supplementary<br>Table 5 | Function enrichment analysis of differentially-expressed serum proteins identified in COVID-19 patients using the STRING database |
| Supplementary<br>Table 6 | Correlation analysis of differentially-expressed COVID-19 proteins and clinical indices.                                          |
| Supplementary<br>Table 7 | Protein-protein interaction analysis of serum proteins correlated with the neutrophil and lymphocyte using STRING database.       |
